# Supplementary material for: Comparison of DNA Extraction Methods for the Detection of Canned Tuna Species with DNA Mini-Barcoding
Source: Hindawi journal article supplement (doi:10.1155/2023/7121260), 2023-11-02
Supplement: f1 [file 7121260.f1.txt]

Sample Number	Packaging Medium	Declared Species	Price/unit (USD)	Species ID	Sequence Obtained from DNeasy Extraction Method	Sequence Obtained from DNeasy + PC Extraction Method	Sequence Obtained from MP+N Extraction Method	Sequence Obtained from DNeasy MF Extraction Method
T01-1	Water	Light tuna	$1.29	N/A	N/A	N/A	N/A	N/A
T01-2	Water	Light tuna	$1.29	N/A	N/A	N/A	N/A	N/A
T02-1	Water	Light tuna	$1.99	N/A	N/A	N/A	N/A	N/A
T02-2	Water	Light tuna	$1.99	N/A	N/A	N/A	N/A	N/A
T03-1	Water	Light tuna	$0.99	N/A	N/A	N/A	N/A	N/A
T03-2	Water	Light tuna	$0.99	N/A	N/A	N/A	N/A	N/A
T04-1	Oil	Light tuna	$0.99	Albacore tuna (Thunnus alalunga)	N/A	N/A	ATAACTATATTTGAAACATATATAATAATGCTTTAGGACATATATGTATTAAAACCATAACTAGTATTTAACCATTCATATGTCAACATATCATGAAGACTTACATAAAACATAACAACCACCCCYCAACACTTTAWTTATATCATGTAATTAAACGAGATTTAAGACCTAACATGAACCTAAATCGTCTGA	N/A
T04-2	Oil	Light tuna	$0.99	Albacore tuna (Thunnus alalunga)	N/A	N/A	ATAACTATATTTGAAACATATATAATAATGCTTTAGGACATAYATGTATTAAAACCATAACTAGTATTTAACCATTCATATGTCAACATATCATGAAGACTTACATAAGACATAACAACCATCCCCCAACACTTTGCTTATATCGCGTAATTAAACGAGATTTAAGACCTAACATAAACCTAAATCGTCTAAGCCATACCAAGTCCCCTCATCTCTAAAATCTAGTAAACTTATG	N/A
T05-1	Oil	Light tuna	$0.99	Bigeye tuna (Thunnus obesus)	ACAATTATATATCAACCATATATAATAATGGACTATATGTATTAAAACTATTACTAGTATTAAACCATTCATATGTCAACATACAATGAAGATTTACATAAACCATACAGATCTTTCCCAACCTTTCAATTAATTCCTGTAATTAAACGAGATTTAAGACCTACCACAATACACTAAATCGTCTAAGCCATACCCAGTCTCCCCCTTCCTGAAATCGACTAAATTTAAG	N/A	N/A	N/A
T05-2	Oil	Light tuna	$0.99	Bigeye tuna (Thunnus obesus)	ATATTTATATATGAACCATATACAGTAATGTTCTAGGACATATATGTACTAAAACCATTACTAGTACTAAACCATTCATATGTCAACAAACAATGAAGACTTACATAAACCATACAGATATATCCCAACATTCAAATTAAGTCAGGTAATTAAACGAGATTTAAGACCTACCACAAACACTAAATCGTCTAAGCCATACCAAGTCTCCCCATCCCTGAAATCGAGTAAATTTAAG	N/A	N/A	N/A
T06-1	Oil	Light tuna	$1.99	N/A	N/A	N/A	N/A	N/A
T06-2	Oil	Light tuna	$1.99	N/A	N/A	N/A	N/A	N/A
T07-1	Water	Albacore tuna	$2.19	Albacore tuna (Thunnus alalunga)	ATAACTATATTTGAAACATATATAATAATGCTTTAGGACATGTATGTATTAAAACCATAACTAGTATTTAACCATTCATATGTCAACATATCATGAAGACTTACATAAAGCATAATAACCATTCCCCAACACTTCACTAATATCATGTGATTAAACGAGATTTAAGACCTAACATAAACCTAAATCGTCTGAAGCCATACCAAGTCCCCCCATCTCTAAAATCTAGTAAACTTATG	ATAACTATATTTGAAACATATATAATAATGNCTTTAGGACATGTATGTATTAAAACCATAACTAGTATTTAACCATTCATATGTCAACATATCATGAAGACTTACATAAAGCATAATAACCATTCCCCAACACTTCACTAATATCATGTGATTAAACGAGATTTAAGACCTAACATAAACCTAAATCGTCTGAAGCCATACCAAGTCCCCCCATCTCTAAAATCTAGTAAACTTATG	ATAACTATATTTGAAACATATATAATAATGCTTTAGGACATGTATGTATTAAAACCATAACTAGTATTTAACCATTCATATGTCAACATATCATGAAGACTTACATAAAGCATAATAACCATTCCCCAACACTTCACTAATATCATGTGATTAAACGAGATTTAAGACCTAACATAAACCTAAATCGTCTGAAGCCATACCAAGTCCCCCCATCTCTAAAATCTAGTAAACTTATG	N/A
T07-2	Water	Albacore tuna	$2.19	Albacore tuna (Thunnus alalunga)	ATAACTATATTTGAAACATATATAATAATGCTTTAGGACATGTATGTATTAAAACCATAACTAGTATTTAACCATTCATATGTCAACATATCATGAAGACTTACATAAAGCATAATAACCATTCCCCAACACTTCACTAATATCATGTGATTAAACGAGATTTAAGACCTAACATAAACCTAAATCGTCTGAAGCCATACCAAGTCCCCCCATCTCTAAAATCTAGTAAACTTATG	ATAACTATATTTGAAACATATATAATAATGCTTTAGGACATGTATGTATTAAAACCATAACTAGTATTTAACCATTCATATGTCAACATATCATGAAGACTTACATAAAGCATAATAACCATTCCCCAACACTTCACTAATATCATGTGATTAAACGAGATTTAAGACCTAACATAAACCTAAATCGTCTGAAGCCATACCAAGTCCCCCCATCTCTAAAATCTAGTAAACTTATG	ATAACTATATTTGAAACATATATAATAATGCTTTAGGACATGTATGTATTAAAACCATAACTAGTATTTAACCATTCATATGTCAACATATCATGAAGACTTACATAAAGCATAATAACCATTCCCCAACACTTCACTAATATCATGTGATTAAACGAGATTTAAGACCTAACATAAACCTAAATCGTCTGAAGCCATACCAAGTCCCCCCATCTCTAAAATCTAGTAAACTTATG	ATAACTATATTTGAAACNTACATACATGGCTTTTAGGACATGTATGTATTAAAACCATAACTAGTATTTAACCATTCATATGTCAACATATCATGAAGACTTACATAAAGCATAATAACCATTCCCCAACACTTCACTAATATCATGTGATTAAACGAGATTTAAGACCTAACATAAACCTAAATCGTCTGAAGCCATACCAAGTCCCCCCATCTCTAAAATCTAGTAAACTTATG
T08-1	Water	Albacore tuna	$4.39	N/A	N/A	N/A	N/A	N/A
T08-2	Water	Albacore tuna	$4.39	Albacore tuna (Thunnus alalunga)	AGGCTTTAGGACATATATGTATTAAAACCATAACTAGTATTTAACCATTCATATGTCAACATATCATGAAGACTTACATAAGACATAACAACCATCCCCCAACACTTTATTTATATCATGTAATTAAACGAGATTTAAGACCTAACACGAACCTAAATCGTCTAAACCCTACCCAGTCCCCCCCTCTCTTAAATCTAGTAAACTTATG	N/A	N/A	ATAACTATATTTGAAACATACATAATAATGCTTTAGGACATACATGTATTAAAACCATAACTAGTATTTAACCATTCATATGTCAACATATCATGAAGACTTACATAAGACATATCAATCACCTCTCAACATTCTAGTTATATCTGGATGATAAAACAAAATTTAAAATCTAACTTAAATCTAAATCGTCCAAGCCACACCAAGTCCCCTCATCTCTAAAATCTCGTAAATTCATG
T09-1	Water	Albacore tuna	$1.79	Albacore tuna (Thunnus alalunga)	ATAACTATATTTGAAACATATATAATAATGCTTTAGGACATATATGTATTAAAACCATAACTAGTATTTAACCATTCATATGTCAACATATCATGAAGGTTTGCATAAGACATATCAATCACCTTTCAACACTCTAGTTATAACTGTATGATTAAACGAGATTTAAGACCTAACATAAGCCTAAATCGTCTAAGCCACACCAAGTCCCCTCATCTCTAAAGTCTCGTAAATTCATG	ATAACTATATTTGAAGCATATATAATAATGCTTTAGGACATATATGTATTAAAACCATAACTAGTATTTAACCATTCATATGTCAACATATCATGAAAACTTACATAAAGCATAACAATCATTCCCCAACACTTTACTTATATCACGTAATTAAACGAGATTTAAGACCTAACACAAACCTAAATCGTCTAAGCCACACCAAGTCCCCTCATCTCTAAAATCTGGTGAACTTATG	ATAACTATATTTGAAACATATATAATAATGCTTTAGGACATGTATGTATTAAAACCATAACTAGTATTTAACCATTCATATGTCAACATATCATGAAGACTTACATAAAGCATAATAACCATTCCCCAACACTTCACTWATATCATGTGATTAAACGAGATTTAAGACCTAACATAAACCTAAATCGTCTGAAGCCATACCAAGTCCCCCCATCTCTAAAATCTAGTAAACTTATG	ATAACTATATTTGAAACATATATAATAATGCTTTAGGACATATATGTATTAAAACCATAACTAGTATTTAACCATTCATATGTCAACATATCATGAAAACTTACATAAACCATAACAACCATTCCCCAACACTTTACTTATATCACGTAATTANAACGAGATTTAAGACCTAACACAAACCTAAATCGTCTAAGCCACACCAAGTCCCCCCATCCCTAAAATCTGGTAAACTTATG
T09-2	Water	Albacore tuna	$1.79	Albacore tuna (Thunnus alalunga)	N/A	TTTGAAGCATATATAATTATGCTTKGAGGACATATATGTATTAAAACCATAAYTAGTATTTAACCATTCATATGTTCAACATATCATGAAAACTTACATAAAGCATAACAATCATTCCCCAACACTTTACTTATATCACGTAATTAAACGAGATTTAAGACCTAACACAAACCTAAATCGTCTAAGCCACACCAAGTCCCCTCATCTCTAAAATCTGGTGAACTTATG	N/A	ATAACTATATTTGAACCATATATAATAATGCTTTAGGGACATATATGTATTAAAACCATAACTAGTATTTAACCATTCATATGTCAACATATCATGAAGACTTACATAAAACATAACAATTATCCTCCAACACTTTATTTATATCGSGTAATTAAACGANGATTTAAGACCTAMCATAAACCTAAATCGTCCAAGCCATTCCAAGGCCCCCCATCTCTAAAATCTAGTAAATTTATG
T10-1	Oil	Albacore tuna	$4.79	Albacore tuna (Thunnus alalunga)	ATAACTATATTTGAAACATATATAATAATGCTTTAGGACATATATGTATTAAAACCATAACTAGTATTTAACCATTCATATGTCAACATATCATGAAGACTTACATAAAACATAACAGCCATCCTCCAACACTTTATTTATATCACGTAATTAAACGAGATTTAAGACCTAACATGAACCTAAATCGTCTAAGCCATACCAAGTCCCCTCATCTCTAAAATCTAGTAAATTTATG	ATAACTATATTTGAAACATATATAATAATGCTTTAGGACATATATGTATTAAAACCATAACTAGTATTTAACCATTCATATGTCAACATATCATGAAGACTTACATAAAACATAACARCCATCCTCCAACACTTTATTWATATCACGTAATTAAACGAGATTTAAGACCTAACATRAACCTAAATCGTCTGAAGCCTTCCCAGGCCCCTCCTCTTTTAAATC	ATAACTATATTTGAAACATATATAATAATGCTTTAGGACATATATGTATTAAAACCATAACTAGTATTTAACCATTCATATGTCAACATATCATGAAGACTTACATAAAACATAACAGCCATCYTCCAACACTTTATTTATATCAMGTAATTAAACGAGATTTAAGACCTAACATGAACCTAAATCGTCTAAGCCATACCAAGTCCCCTCATCTCTAAAATCTAGTAAATTTATG	ATAACTATATTTGAAACATATATAATAATGCTTTAGGACATATATGTATTAAAACCATAACTAGTATTTAACCATTCATATTGTCAACATATCATGAAGACTTACATAAAACATAACAGCCATCTTCCAACACTTTATTTATATCACGTAATTAAACGAGATTTAAGACCTAACATGAACCTAAATCGTCTAAGCCATACCAAGTCCCCTCATCTCTAAAATCTAGTAAATTTATG
T10-2	Oil	Albacore tuna	$4.79	Albacore tuna (Thunnus alalunga)	ATAACTATATTTGAAACATATATAATAATGCTTTAGGACATATATGTATTAAAACCATAACTAGTATTTAACCATTCATATGTCAACATATCATGAAGACTTACATAAAACATAACAGCCATCCTCCAACACTTTATTTATATCACGTAATTAAACGAGATTTAAGACCTAACATGAACCTAAATCGTCTAAGCCATACCAAGTCCCCTCATCTCTAAAATCTAGTAAATTTATG	ATAACTATATTTGAAACATAYATAATAATGCTTTAGGACATATATGTATTAAAACCATAACTAGTATTTAACCATTCATATGTCAACATATCATGAAGACTTACATAAAACATAACAACCATCTYTCAACACTTTATYTATATCAAGTAATTAAACGAGATTTAAGACCTAACATGAACCTAAATCGTCTAAGCCATACCAAGTCCCCTCATCTCTAAAATCTCGTAAACCTATG	ATAACTATATTTGAAACATAYATAATAATGCTTTAGGACATATATGTATTAAAACCATAACTAGTATTTAACCATTCATATGTCAACATATCATGAAGACTTACATAAAACATAACAGCCATCYTCCAACACTTTATTTATATCACGTAATTAAACGAGATTTAAGACCTAACATGAACCTAAATCGTCTAAGCCATACCAAGTCCCCTCATCTCTAAAATCTAGTAAATTTATG	N/A
T11-1	Oil	Albacore tuna	$3.49	Albacore tuna (Thunnus alalunga)	N/A	N/A	N/A	TTTTTGAACTAATATAATAATGGCTTTAGGGACTATATGTATTAAAACCATAACTAGTATTTAACCATTCATATGTCAACATATCATGAAGACTTACATGAAMCATAACAACCWTCCCCCAACACTTTACTTATATCACGTAATTAAACGAAATTTAAAACCTAACACAAACCTAAATCGTCTAAGCCATACCAAGTACCCCCCTTCCTAAAATCTGGTAAATTTATG
T11-2	Oil	Albacore tuna	$3.49	N/A	N/A	N/A	N/A	N/A
T12-1	Oil	Albacore tuna	$2.29	Albacore tuna (Thunnus alalunga)	ATAACTATATTTGAAACATATATAATAATGCTTTAGGACATATATGTATTAAAACCATAACTAGTATTTAACCATTCATATGTCAACATATCATGAAGACTTACATAAAACATACTAACTATCTCCCAACACTTTATTTATATCACGTAATTAGACGAGATTTAAGACCTAACATAAACCTAAATCGTCTAAGCCATACCAAGTCCCCTCATCTCTAAAATCTAGTAAACTTATG	ATAACTATATTTGAAACATATATAATAATGCTTTAGGACATATATGTATTAAAACCATAACTAGTATTTAACCATTCATATGTCAACATATCATGAAGACTTACATAAAACATACTAACTATCTCCCAACACTTTATTTATATCASGTAATTAGACGAGATTTAAGACCTAACATAAACCTAAATCGTCTAAGCCATACCAAGTCCCCTCATCTCTAAAATCTAGTAAACTTATG	ATATATATATATGANACATATATAATAATACTTTAGGNCATATATGTATTAAAACCATATGTTAATATTTAACCATTCATATGTCAACATATCATGAAGACTTACATAAAACATACTAACTNTCTCCCAACACTTTATTTATATCACGTAATTAGACGAGATTTAAGACCTAACATAAACCTAAATCGTCTAAGCCATACCAAGTCCCCTCATCTCTAAAATCTAGTAAACTTATG	ATAACTATATTTGAAACATATATAATAATGCTTTAGGACATATATGTATTAAAACCATAACTAGTATTTAACCATTCATATGTCAACATATCATGAAGACTTACATAAAACATACTAACTATCTCCCAACACTTTATTTATATCACGTAATTAGACGAGATTTAAGACCTAACATAAACCTAAATCGTCTAAGCCATACCAAGTCCCCTCATCTCTAAAATCTAGTAAACTTATG
T12-2	Oil	Albacore tuna	$2.29	Albacore tuna (Thunnus alalunga)	ATAACTATATTTGAAACATATATAATAATGCTTTAGGACATATATGTATTAAAACCATAACTAGTATTTAACCATTCATATGTCAACATATCATGAAGACTTACATAAAACATACTAACTATCTCCCAACACTTTATTTATATCACGTAATTAGACGAGATTTAAGACCTAACATAAACCTAAATCGTCTAAGCCATACCAAGTCCCCTCATCTCTAAAATCTAGTAAACTTATG	ATAACTATATTTGAAACATATATAATAATGCTTTAGGACATATATGTATTAAAACCATAACTAGTATTTAACCATTCATATGTCAACATATCATGAAGACTTACATAAAACATACTAACTATCTCCCAACACTTTATTTATATCACGTAATTAGACGAGATTTAAGACCTAACATAAACCTAAATCGTCTAAGCCATACCAAGTCCCCTCATCTCTAAAATCTAGTAAACTTATG	ATAACTATATTTGAAACATATATAATAATGCTTTAGGACATATATGTATTAAAACCATAACTAGTATTTAACCATTCATATGTCAACATATCATGAAGACTTACATAAAACATACTAACTATCTCCCAACACTTTATTTATATCACGTAATTAGACGAGATTTAAGACCTAACATAAACCTAAATCGTCTAAGCCATACCAAGTCCCCTCATCTCTAAAATCTAGTAAACTTATG	ATAACTATATTTGAAACATATATAATAATGCTTTAGGACATATATGTATTAAAACCATAACTAGTATTTAACCATTCATATGTCAACATATCATGAAGACTTACATAAAACATACTAACTATCTCCCAACACTTTATTTATATCACGTAATTAGACGAGATTTAAGACCTAACATAAACCTAAATCGTCTAAGCCATACCAAGTCCCCTCATCTCTAAAATCTAGTAAACTTATG
T13-1	Water	Skipjack tuna	$2.69	N/A	N/A	N/A	N/A	N/A
T13-2	Water	Skipjack tuna	$2.69	N/A	N/A	N/A	N/A	N/A
T14-1	Water	Skipjack tuna	$3.29	N/A	N/A	N/A	N/A	N/A
T14-2	Water	Skipjack tuna	$3.29	N/A	N/A	N/A	N/A	N/A
T15-1	Water	Skipjack tuna	$2.29	N/A	N/A	N/A	N/A	N/A
T15-2	Water	Skipjack tuna	$2.29	N/A	N/A	N/A	N/A	N/A
T16-1	Water	Skipjack tuna	$2.00	N/A	N/A	N/A	N/A	N/A
T16-2	Water	Skipjack tuna	$2.00	N/A	N/A	N/A	N/A	N/A
T17-1	Oil	Skipjack tuna	$2.99	N/A	N/A	N/A	N/A	N/A
T17-2	Oil	Skipjack tuna	$2.99	N/A	N/A	N/A	N/A	N/A
T18-1	Oil	Skipjack tuna	$9.39	Albacore tuna (Thunnus alalunga), Yellowfin tuna (Thunnus albacares)	N/A	N/A	ATAACTATATTTGAAACATATATAATAATGCTTTAGGACATGTATGTATTAAAACTATAACTAGTATTTAACCATTCATATGTCAACATATCATGAAGACTTACATAAAGCATAATAACCATTCCCCAACACTTCACTAATATCATGTGATTAAACGAGATTTAAGACCTAACATAAACCTAAATCGTCTGAAGCCATACCAAGTCCCCCCATCTCTAAAATCTAGTAAACTTATG	ATACTCATATATCGACCATATATAATAATGCTTTAGGACATATATGTATTAAAACCATTACTAGTACTAAACCATTCATATGTCAACAAACAATGAAGACTTACATAAACCATACAGATATATCTTAACATTCAACCTAAGTCAAGTAATTAAACGAGATTTAAGACCTACCATAACAACTAAATCGTCTAAGCNNNACCAAGNATCCCCATTCCTAAAGTCAGGTAAATTTAAG
T18-2	Oil	Skipjack tuna	$9.39	N/A	N/A	N/A	N/A	N/A
T19-1	Water	Yellowfin tuna	$4.49	N/A	N/A	N/A	N/A	N/A
T19-2	Water	Yellowfin tuna	$4.49	Yellowfin tuna (Thunnus albacares)	N/A	N/A	N/A	ATACTCATATATCGACCATATATAATAATGCTTTAGGACATATATGTATTAAAACCATTACTAGTACTAAACCATTCATATGTCAACAAACAATGAAGATTTACATAAACCATACAGATATATCTTAATATTCAATCTAAGTCAAGTAATTAAACGAGATTTAAGACCTACCATAACAACTAAATCGTCTAAGCCATACCAAGTATCCTCATTCCTAAAGTCAGGTGAATTTAAG
T20-1	Water	Yellowfin tuna	$8.99	Yellowfin tuna (Thunnus albacares)	ATACTTATATATCGACCATATATAATAATGCTTTAGGACATATATGTATTAAAACCATTACTAGTACTAAACCATTCATATGTCAACAAACAATGAAGATTTACATAAACCATACAGATATATCTTAATATTCAATCTAAGTCAAGTRATTAAACGAGATTTAAGACCTACCATAAAAACTAAATCGTCTAAGCC	ATACTTATATATCGACCATATATAATAATGCTTTAGGACATATATGTATTAAAACCATTACTAGTACTAAACCATTCATATGTCAACAAACAATGAAGATTTACATAAACCATACAGATATATCTTAATATTCAATCTAAGTCAAGTAATTAAACGAGATTTAAGACCTACCATAAAAACTAAATCGTCTAAGCCAT	N/A	ATACTTATATATCGACCATATATAATAATGCTTTAGGACATATATGTATTAAAACCATTACTAGTACTAAACCATTCATATGTCAACAAACAATGAAGATTTACATAAACCATACAGATATATCTTAATATTCAATCTAAGTCAAGTAATTAAACGAGATTTAAGACCTACCATAAAAACTAAATCGTCTAAGCCATACCAAGTATCCTCATTCCTAAAGTCAGGTAAATTTAAG
T20-2	Water	Yellowfin tuna	$8.99	Yellowfin tuna (Thunnus albacares)	ATACTTATATATCGACCATATATAATAATGCTGTAGGACATATATGTATTAAAACCATTACTAGTACTAAACCATTCATATGTCAACAAACAATGAAGATTTACATAAACCATACAGATATATCTTAATATTCAATCTAAGTCAAGTAATTAAACGAGATTTAAGACCTACCATAAAAACTAAATCGTCTAAGCCATACCAAGTATCCTCATTCCTAAAGTCAGGTAAATTTAAG	N/A	N/A	N/A
T21-1	Oil	Yellowfin tuna	$3.59	Yellowfin tuna (Thunnus albacares)	ATATTCATATATCGACCATATATAATAATGCTTTGAGGACATATATGTATTAAAACCATTACTAGTACTAAMCCATTCATATGTCAACAAACAATGAAGACTTACATAAACCATACAGATATATCTTAACATTCAATCTAAGTCAAGTAATTAAACGAGATTTAAGATCTACCATAACAACTAAATCGTCTAAGCCATACCAAGTATCCACATTCCTAAAGCCAGGTAAATTTAAG	N/A	N/A	N/A
T21-2	Oil	Yellowfin tuna	$3.59	N/A	N/A	N/A	N/A	N/A
T22-1	Oil	Yellowfin tuna	$2.29	N/A	N/A	N/A	N/A	N/A
T22-2	Oil	Yellowfin tuna	$2.29	N/A	N/A	N/A	N/A	N/A
T23-1	Oil	Yellowfin tuna	$3.99	Yellowfin tuna (Thunnus albacares)	ATACTCATATATCGACCATATATAATAATGCTTTAGGACATATATGTATTAAAACCATTACTAGTACTAAACCATTCATATGTCAACAAACAATGAAGATTTACATAAACCATACAAATATATCTTAATATTCAATCTAAGTCGAGTAATTAAACGAGATTTAAGACCTACCATAAACAACTAAATCGTCTAAGCCATACCAAGTATCCCCATTCCTAAAATCAGGTAAATTTAAG	N/A	N/A	N/A
T23-2	Oil	Yellowfin tuna	$3.99	Yellowfin tuna (Thunnus albacares)	ATACTCATATATCGACCATATATAATAATGCTTTAGGACATANTATGTATTAAAACCATTACTAGTACTAAACCATTCATATGTYAACAAACAATGAAGATTTACATAAACCATACAAATATATCTTAATATTCAATCTAAGTCGAGTAATTAAACGAGATTTAAGACCTACCATAAACAACTAAATCGTCTAAGCCATACCAAGTATCCCCATTCCTAAAATCAGGTAAATTTAAA	N/A	N/A	N/A
T24-1	Oil	Yellowfin tuna	$1.87	Yellowfin tuna (Thunnus albacares)	ATACCCATATATGAACCATATATAATAATGCTTTAGGACATATATGTATTAAAACCATTACTAGTACTAAACCATTCATATGTCAACAAACAATGAAGATTTACATAAACCATACAAGTATATCTTAATATTCAATCTAAGTCAAGKAATTAAACGAGATTTAAGACCTACCATAACAACTAAATCGTCTAAGCCATACCAAGTATCCCCATTCCTAAAGTCAGGTAAATTTAAG	N/A	ATACCCATATATGAACCATATATAATAATGCTTTAGGACATGTATGTATTAAAACCATTACTAGTACTAAACCATTCATATGNCANNNAACAATGAAGATTTACATAAACCATACAAGTATATCTTAATATTCAATCTAAGTCAAGGAATTAAACGAGATTTAAGAACTACCATAACAACTAAATCGTCTGAGCCATACCAAGGATCCCCATTCCTAAAGTCAGGTAAATTTAAG	ATACCCATATATGAACCATATATAATAATGCTTTAGGACATATATGTATTAAAACCATTACTAGTACTAAACCATTCATATGTCAACAAACAATGAAGATTTACATAAACCATACAAGTATATCTTAATATTCAATCTAAGTCAAGTAATTAAACGAGATTTAAGACCTACCATAACAACTAAATCGTCTAAGCCATACCAAGTATCCCCATTCCTAAAGTCAGGTAAATTTAAG
T24-2	Oil	Yellowfin tuna	$1.87	Yellowfin tuna (Thunnus albacares)	ATACCCATATATGAACCATATATAATAATGCTTTAGGACATATATGTATTAAAACCATTACTAGTACTAAACCATTCATATGTCAACAAACAATGAAGATTTACATAAACCATACAAGTATATCTTAATATTCAATCTAAGTCAAGTAATTAAACGAGATTTAAGACCTACCATAACAACTAAATCGTCTAAGCCATACCAAGTATCCCCATTCCTAAAGTCAGGTAAATTTAAGC	N/A	ATACCCATATATGAACCATATATAATAATGCTTTAGGACATATATGTATTAAAACCATTACTAGTATTAAACCATTCATATGTCNAACAAACAATGAAGATTTACATAAACCATACAAGTATATCTCTAATATTCAATCTAAGTCAAGTAATTAAACGAGATTTAAGACCTACCATAACAACTAAATCGTSTAAGCCATACCAAGTATCCCCATTTCTAAAGTCAGGTAAATTTAAG	ATACCCATATATGAACCATATATAATAATGCTTTAGGACATATATGTATTAAAACCATTACTAGTACTAAACCATTCATATGTCAACAAACAATGAAGATTTACATAAACCATACAAGTATATCTTAATATTCAATCTAAGTCAAGTAATTAAACGAGATTTAAGACCTACCATAACAACTAAATCGTCTAAGCCATACCAAGTATCCCCATTCCTAAAGTCAGGTAAATTTAAG
